# Supplementary material
Source: PubMed Central journal article supplement (PMC2728952)
Supplement: 0903393106_0903393106SI.pdf [file 0903393106_0903393106SI.pdf]

# Supporting Information

Runguphan et al. 10.1073/pnas.0903393106

## SI Text

**Verification of Transferred DNA (T-DNA) Integration by Genomic DNA Analysis.** The genomic DNA from transformed hairy roots was isolated (Qiagen Dneasy kit) and then subjected to PCR amplification using T-DNA specific primers with STR primers serving as a positive control (Fig. S1). Specifically, primers for PCR amplification were designed to amplify the complete STR gene (STR<sub>for</sub>: CCATGGCAAACCTTTCTGAATCTAAATCC and STR<sub>rev</sub>: GGTCACCCTAGCTAGAAACATAA-GAATTTTC), a 500-bp region of the CaMV 35S promoter (CaMV 35S<sub>for</sub>: TAGAGGACCTAACAGAAC and CaMV 35S<sub>rev</sub>: CCGTGTCTCTCCAAATG), an 800-bp region of the antibiotic resistance NPTII gene (NPTII<sub>for</sub>: atgcaattacctatcgc and NPTII<sub>rev</sub>: tcagaagaactcgaagaag) and a 550-bp region of the PDK intron (PDK<sub>int</sub><sub>for</sub>: aatagtaattctagctggttg and PDK<sub>int</sub><sub>rev</sub>: tcttgtacaagtggtctag).

Primers for real-time RT-PCR of transformed hairy roots for tryptophan decarboxylase (TDC<sub>for</sub>: TACTTGGATGGAATC-GAACG and TDC<sub>rev</sub>: ACAAATGTGGTTGCTTGACC, amplicon size 106 bp) anthranilate synthase, alpha subunit (AS $\alpha$ <sub>f</sub>: GAACGTTTGCCTTCTCTTC and AS $\alpha$ <sub>for</sub><sub>rev</sub>: CAGCG-GACTTGATAAGACGA, amplicon size 105 bp), strictosidine synthase (STR<sub>for</sub>: GTCCAAGATGGCCGAGTTAT and STR<sub>rev</sub>: TATGTCCTCCACACAATGG, amplicon size 140 bp), strictosidine glucosidase (SGD<sub>for</sub>: ATATTGAT-GCTCGGGAAAGG and SGD<sub>rev</sub>: AGACGGCTTCCTA-CAAGAGC, amplicon size 109 bp) and Orca3 (ORCA3<sub>for</sub>: ATCCAGGATTTGGTTGGGTA and ORCA3<sub>rev</sub>: CTCTA-ACGGGTCCGGAAATA, amplicon size 143 bp). (See Fig. S1.)

**Assessment of Alkaloid Production Rescue by Addition of Tryptamine.** Ten root tips from hairy roots transformed with pTDCi were subcultured in 50 mL of Gamborg's B5 liquid media with

tryptamine as described in *Materials and Methods*. Samples were ionized by ESI with a Micromass LCT Premier TOF Mass Spectrometer. The LC was performed on Acquity Ultra Performance BEH C18, 1.7  $\mu$ m, 2.1  $\times$  100 mm column on a gradient of 10–60% acetonitrile/water (0.1% TFA) over 13 min at a flow rate of 0.6 mL/min. The capillary and sample cone voltages were 1,300 and 60 V, respectively. The desolvation and source temperature were 300 and 100  $^{\circ}$ C. The cone and desolvation gas flow rates were 60 and 800 L/hour. (See Figs. S2 and Fig. S3.)

**Assessment of Alkaloid Mutasynthesis.** See Figs. S4–S7 and Table S1.

**Assessment of the Stability of Alkaloid Production Suppression in Subsequent Subcultures.** Ten root tips from hairy roots transformed with pTDCi were subcultured every 2–3 weeks in 50 mL of Gamborg's B5 liquid media and grown at 26  $^{\circ}$ C in the dark at 125 rpm. Eighteen-day-old hairy roots were processed as described in *Materials and Methods*. (See Fig. S8.)

**Morphology of 2-Week-Old TDCi and Wild-Type Hairy Roots.** See Fig. S9 *a* and *b*.

**Expression Levels of Secologanin Biosynthetic Genes SLS and G10H.** Primers for real-time RT-PCR of transformed hairy roots for secologanin synthase (SLS) (SLS<sub>for</sub>: GGATTGGGCATG-GTTTACTC and SLS<sub>rev</sub>: CCATGGGTTTAGACAAGGCT, amplicon size 140 bp) and geraniol-10-hydroxylase (G10H) (G10H<sub>for</sub>: TGCTTGACCTGTTTGTAGC and G10H<sub>rev</sub>: TCCTCTGCCGATTACTTGTG, amplicon size 132 bp). (See Fig. S10.)

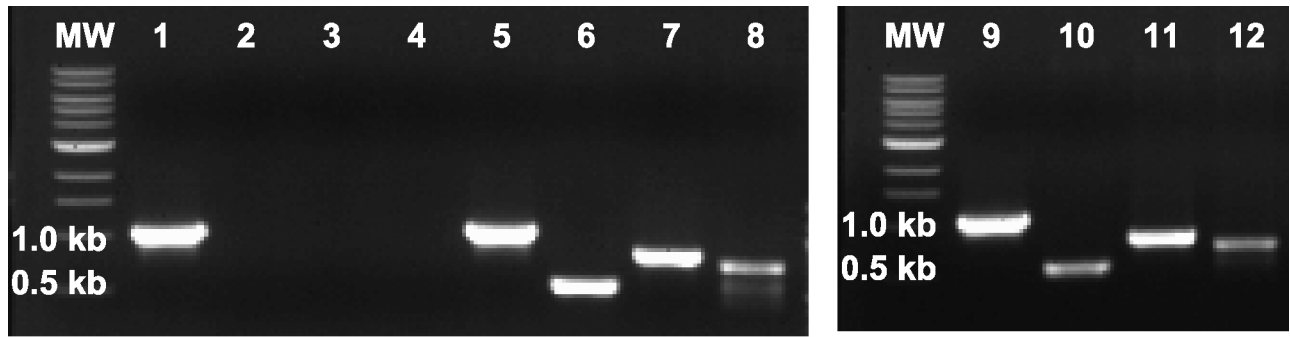

**Fig. S1.** 1% agarose gel of PCR amplification of TDCi and wild-type hairy root genomic DNA. Lane 1: template, wild type; primers, STR. Lane 2: template, wild type; primers, CaMV35S. Lane 3: template, wild type; primers, NPTII. Lane 4: template, wild type; primers, PDK intron. Lane 5: template, TDCi cell line 3; primers, STR. Lane 6: template, TDCi cell line 3; primers, CaMV35S. Lane 7: template, TDCi cell line 3; primers, NPTII. Lane 8: template, TDCi cell line 3; primers, PDK intron. Lane 9: template, TDCi cell line 15; primers, STR. Lane 10: template, TDCi cell line 15; primers, CaMV35S. Lane 11: template, TDCi cell line 15; primers, NPTII. Lane 12: template, TDCi cell line 15; primers, PDK intron

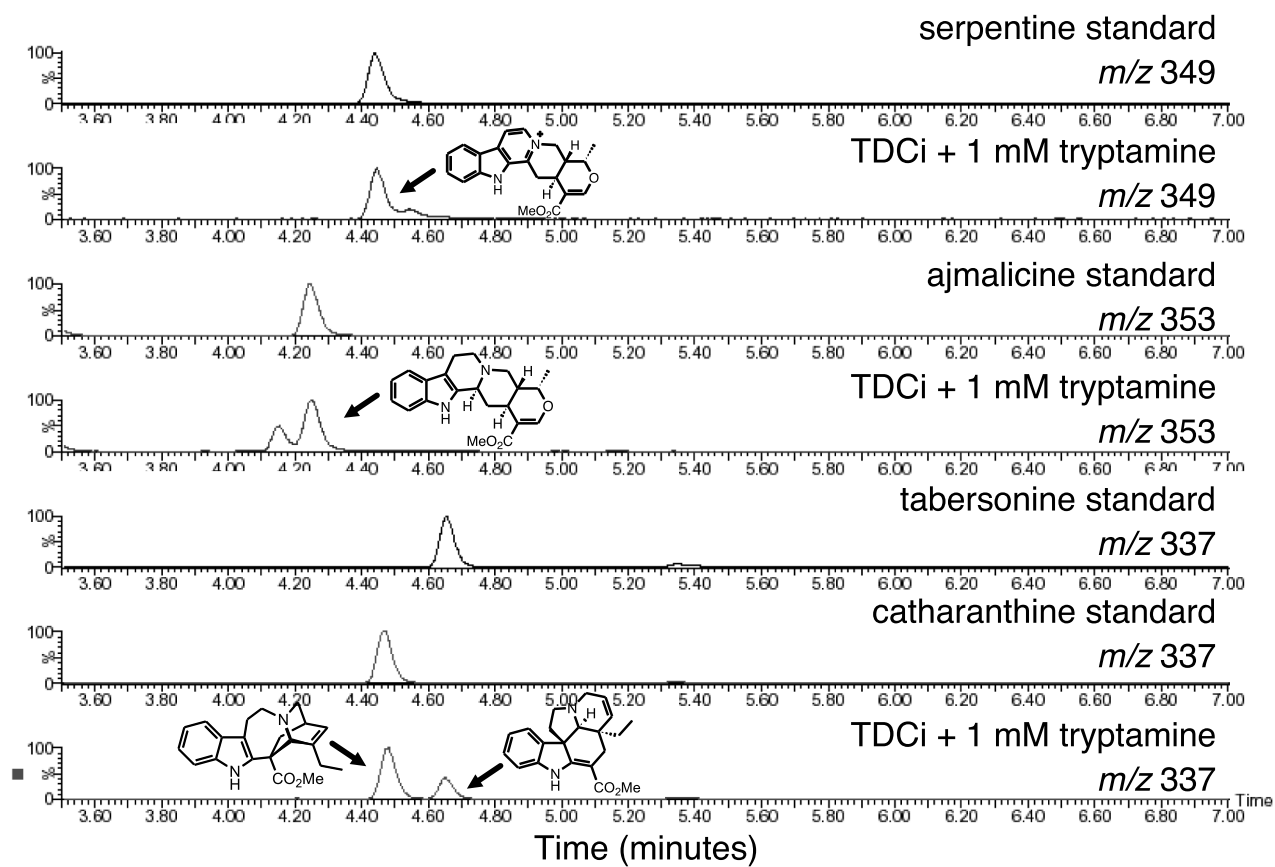

**Fig. S2.** Extracted LC-MS chromatograms showing the presence of ajmalicine, serpentine, catharanthine and tabersonine. These compounds are only present when tryptamine is added to the culture media. Results using a concentration of 1.0 mM tryptamine are shown. Authentic standards of ajmalicine **3**, serpentine **4**, catharanthine **5**, and tabersonine **6** are used to validate the structural assignments of these compounds.

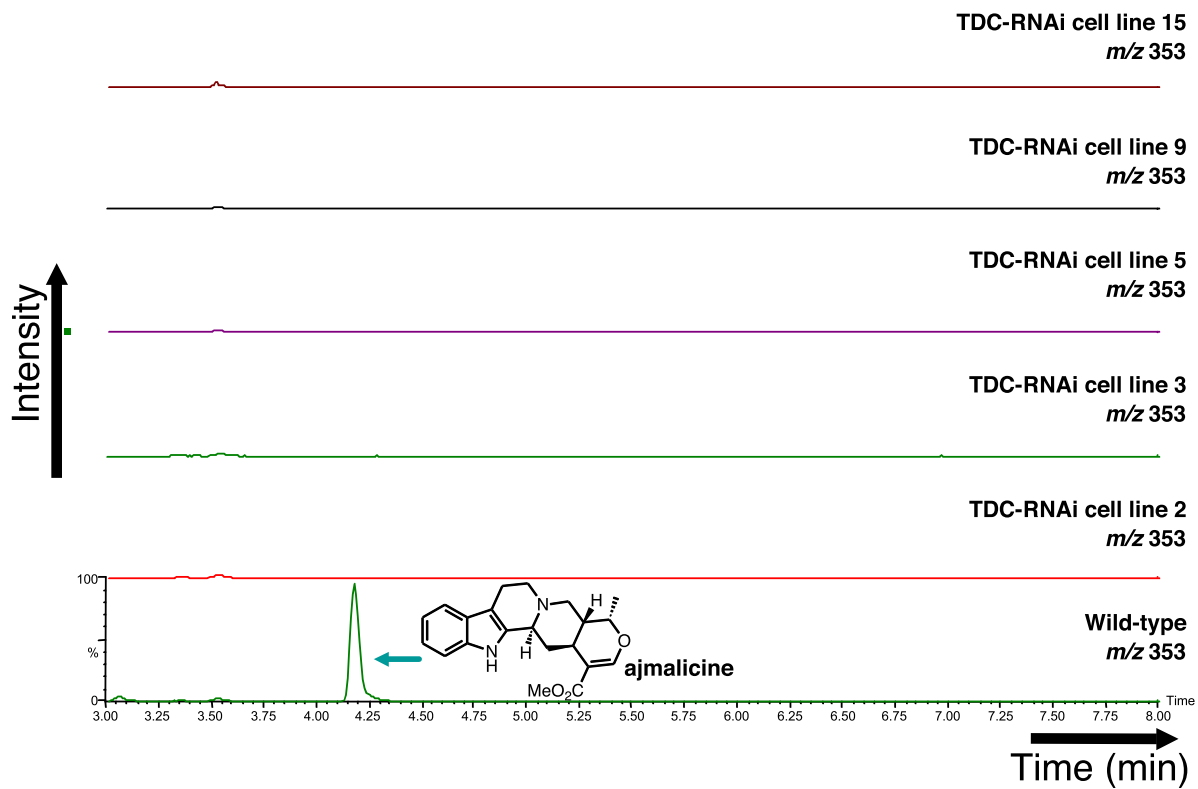

**Fig. S3.** Extracted LC-MS chromatograms showing the absence of A. ajmalicine, B. serpentine, C. catharanthine and tabersonine in five silenced lines. Wild-type lines are shown for comparison. Note that wild-type lines do not produce catharanthine 5 at *m/z* 337; only tabersonine is observed in wild-type lines at this mass. (D) Total ion counts for five silenced lines.

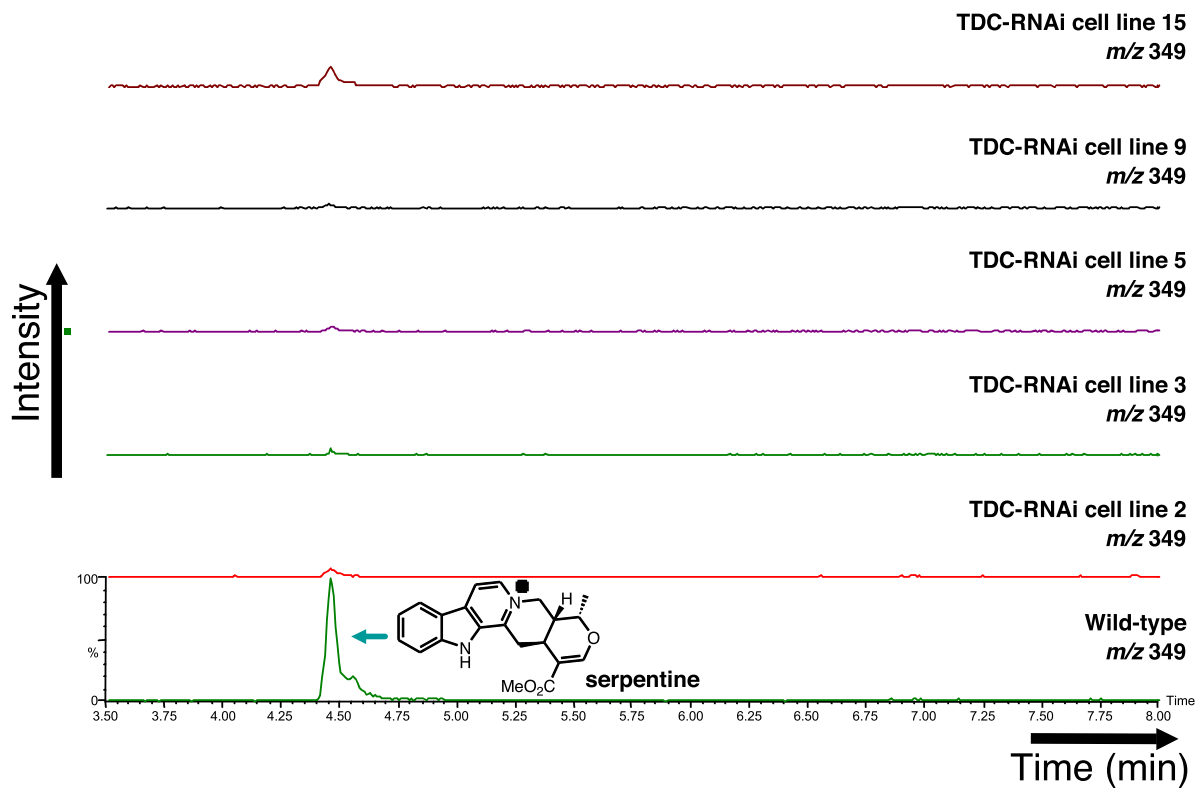

Fig. S3 (continued).

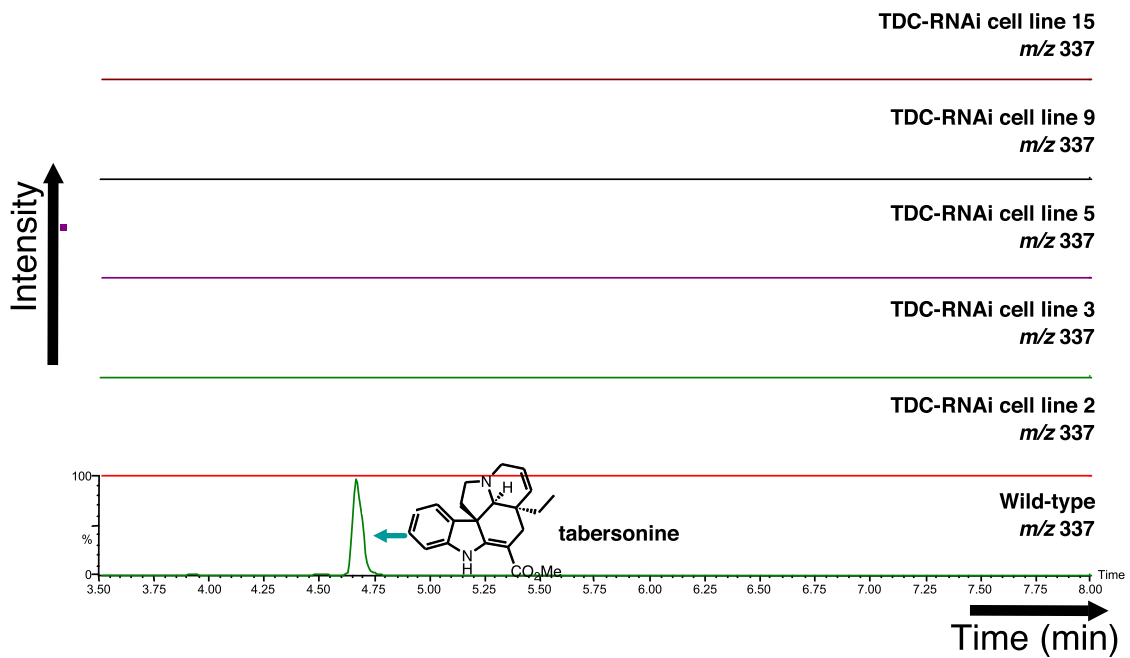

Fig. S3 (continued).



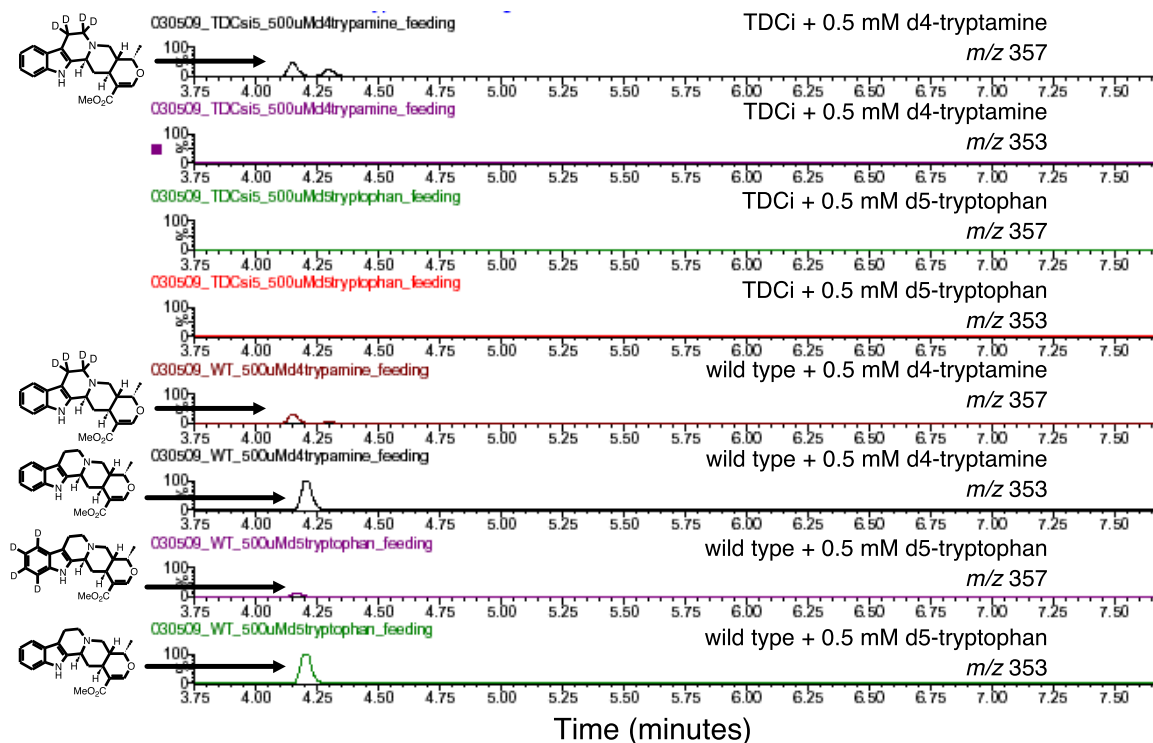

**Fig. S4.** Extracted LC-MS chromatograms showing the presence of deuterated ajmalicine (A), serpentine (B), and catharanthine and tabersonine (C). In the tryptophan decarboxylase suppressed line, these compounds are only present when  $\alpha,\alpha,\beta,\beta$ -d4-tryptamine (CDN Isotopes) is added to the culture media. In the wild-type line, deuterated alkaloids are present when either  $\alpha,\alpha,\beta,\beta$ -d4-tryptamine (CDN Isotopes) or 2',4',5',6',7'-d5-tryptophan (CDN isotope) is added to the culture media. Results using a concentration of 0.5 mM d4-tryptamine or 0.5 mM d5-tryptophan are shown.





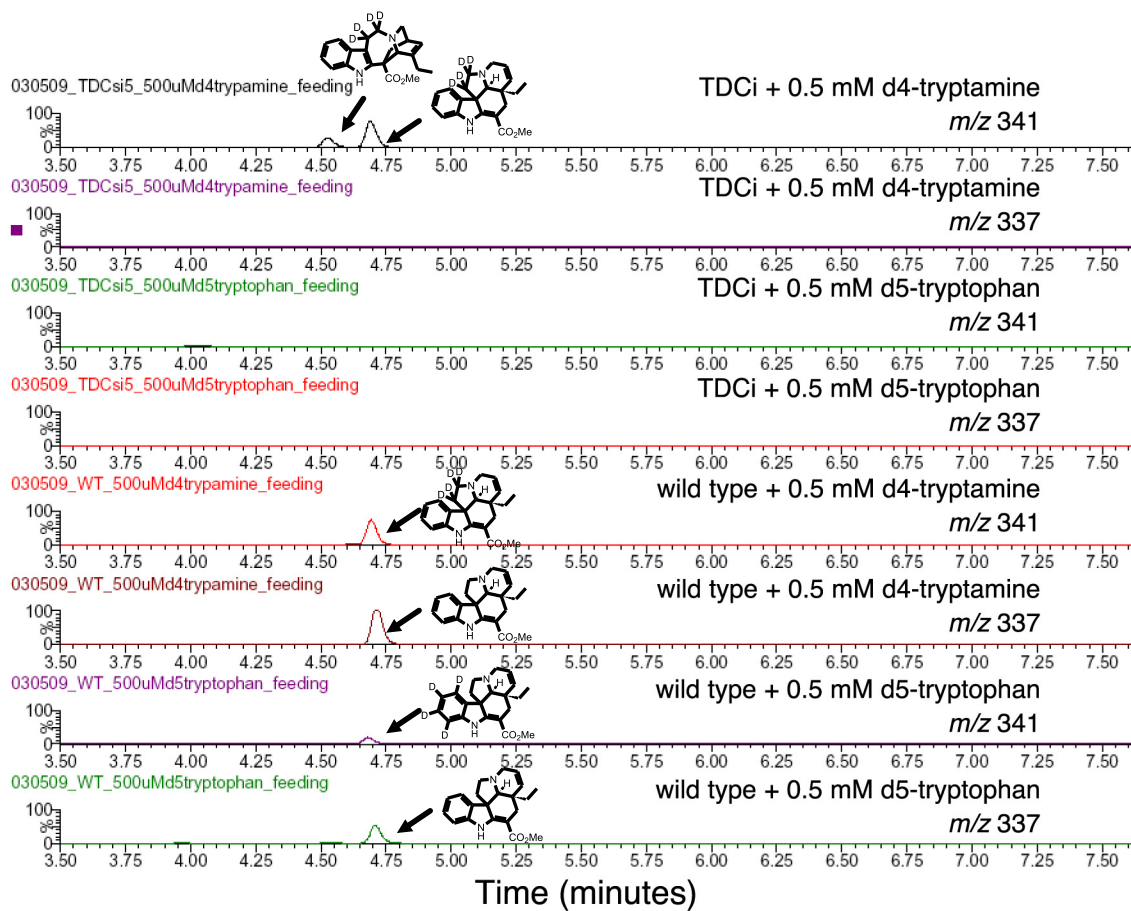

Fig. S4 (continued).

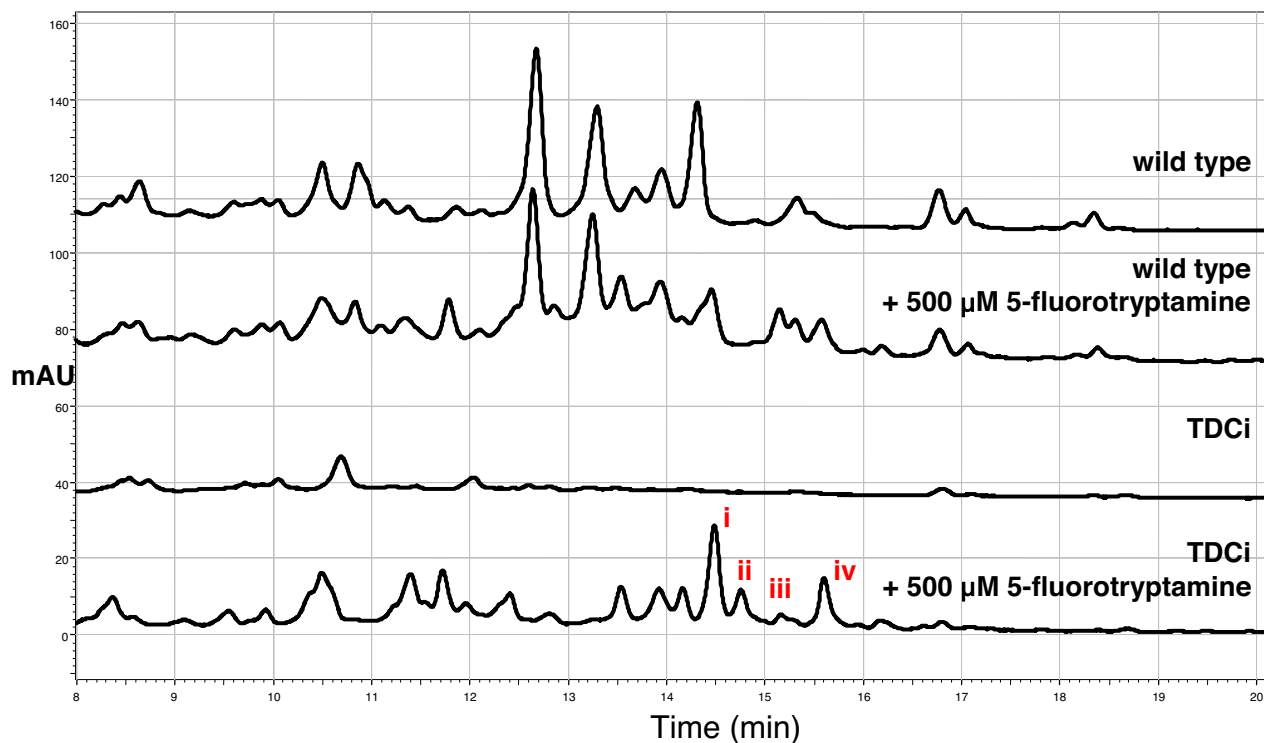

**Fig. S5.** Metabolite production in wild-type and TDCi line as evidenced by high performance liquid chromatography analysis of *C. roseus* hairy root extracts. The alkaloid extracts were run on a Hibar RT 250–4 prepacked reverse phase column using a gradient of 10–60% acetonitrile/water (0.1% TFA) over 25 min at 1 mL/min. Alkaloids were monitored at 280 nm. (i) Fluoro-ajmalicine 3. (ii) Fluoro-catharanthine 5. (iii) Fluoro-tabersonine 6. (iv) Fluoro-serpentine 4.

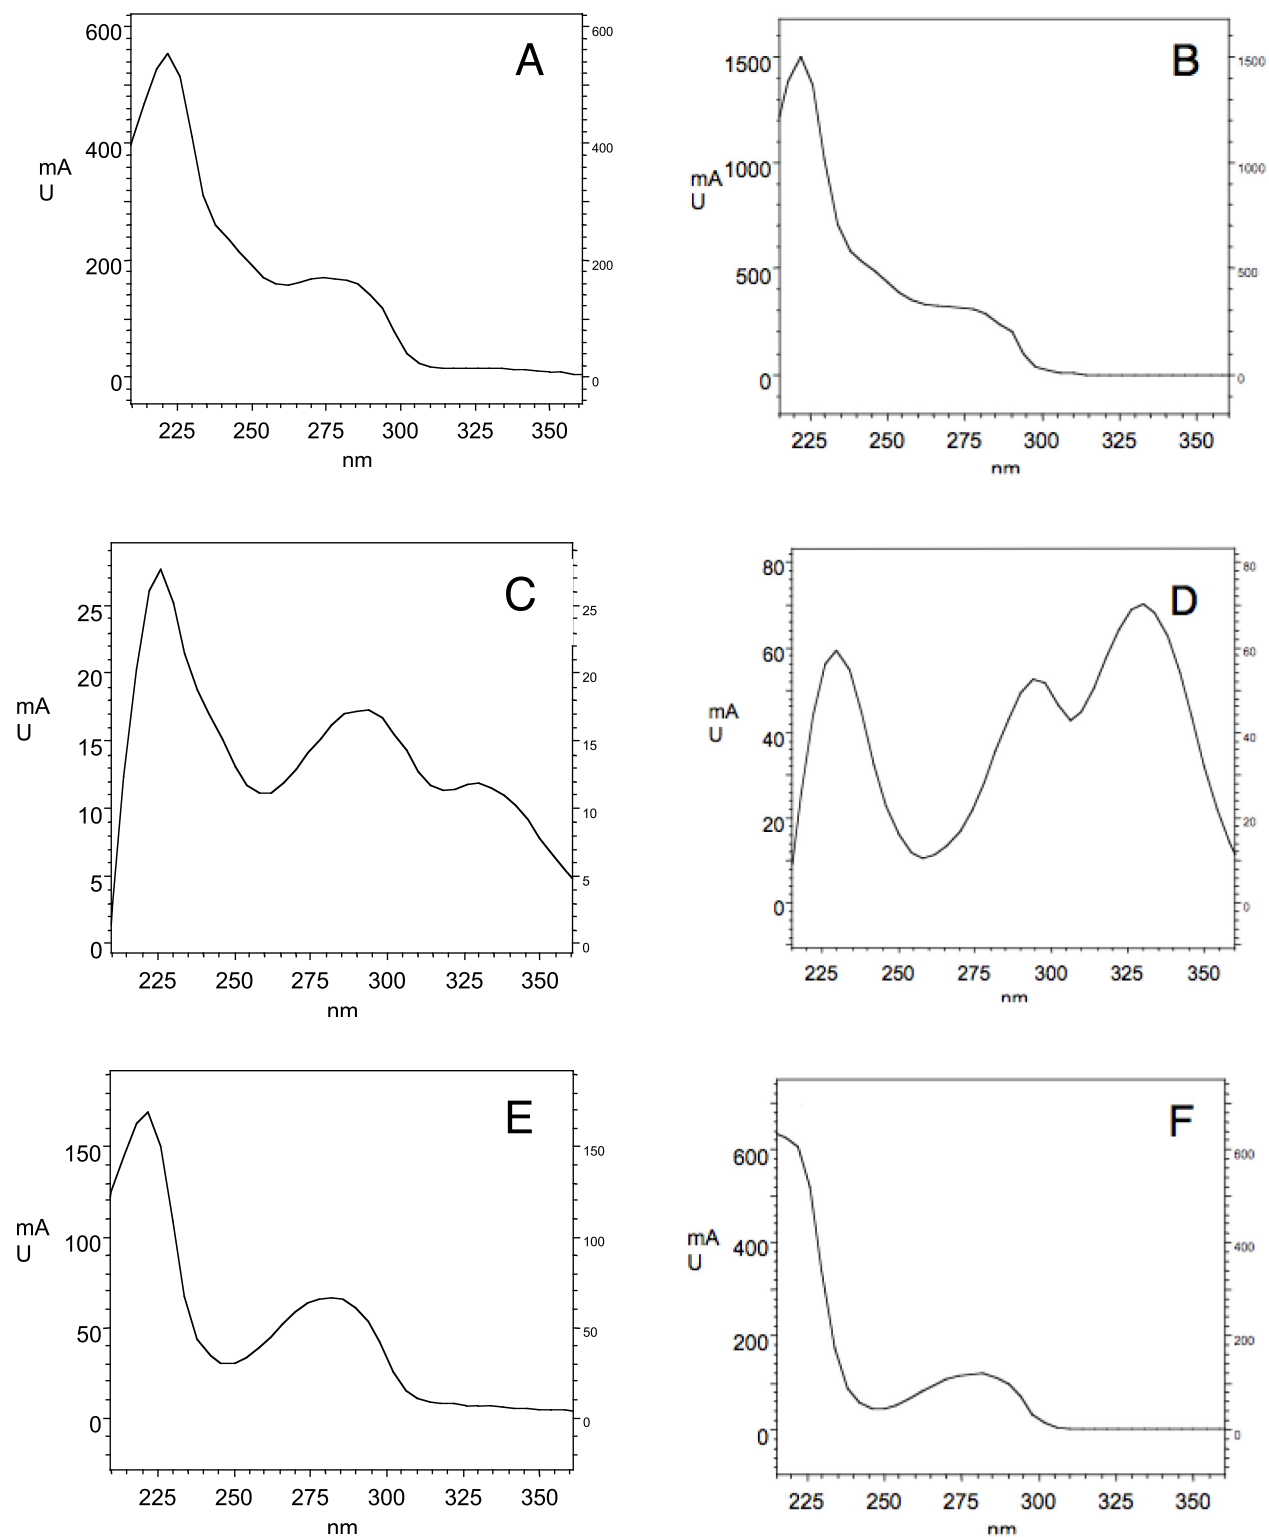

**Fig. S6.** UV spectra of alkaloid standards and selected unnatural alkaloids from TDCi hairy root fed with 5-fluorotryptamine (0.5 mM). (A) 5-fluoroajmalicine (fraction *i* in Fig. S4). (B) Ajmalicine standard. (C) 5-fluorotabersonine (fraction *iii* in Fig. S4). (D) Tabersonine standard. (E) 5-fluorocatharanthine (fraction *ii* in Fig. S4). (F) Catharanthine standard. (G) 5-fluoroserpentine (fraction *iv* in Fig. S4). (H) serpentine standard.

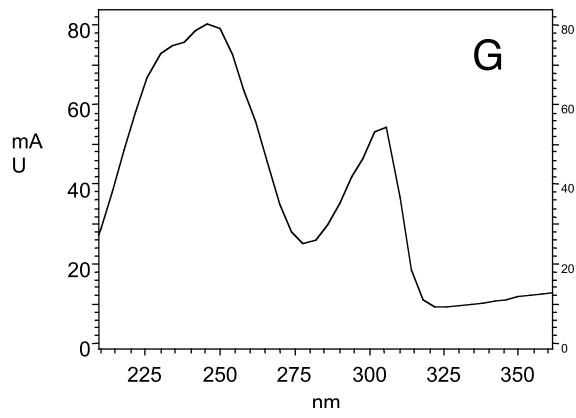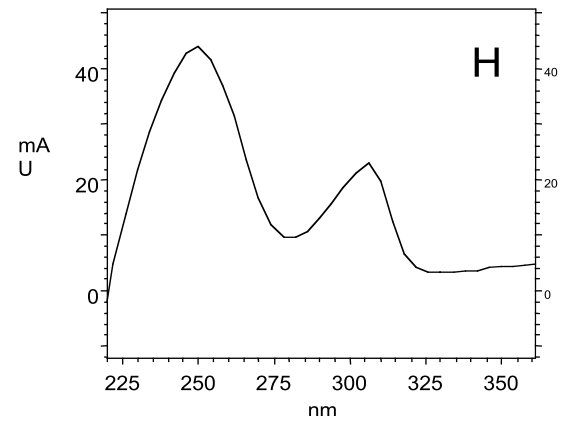

Fig. S6 (continued).

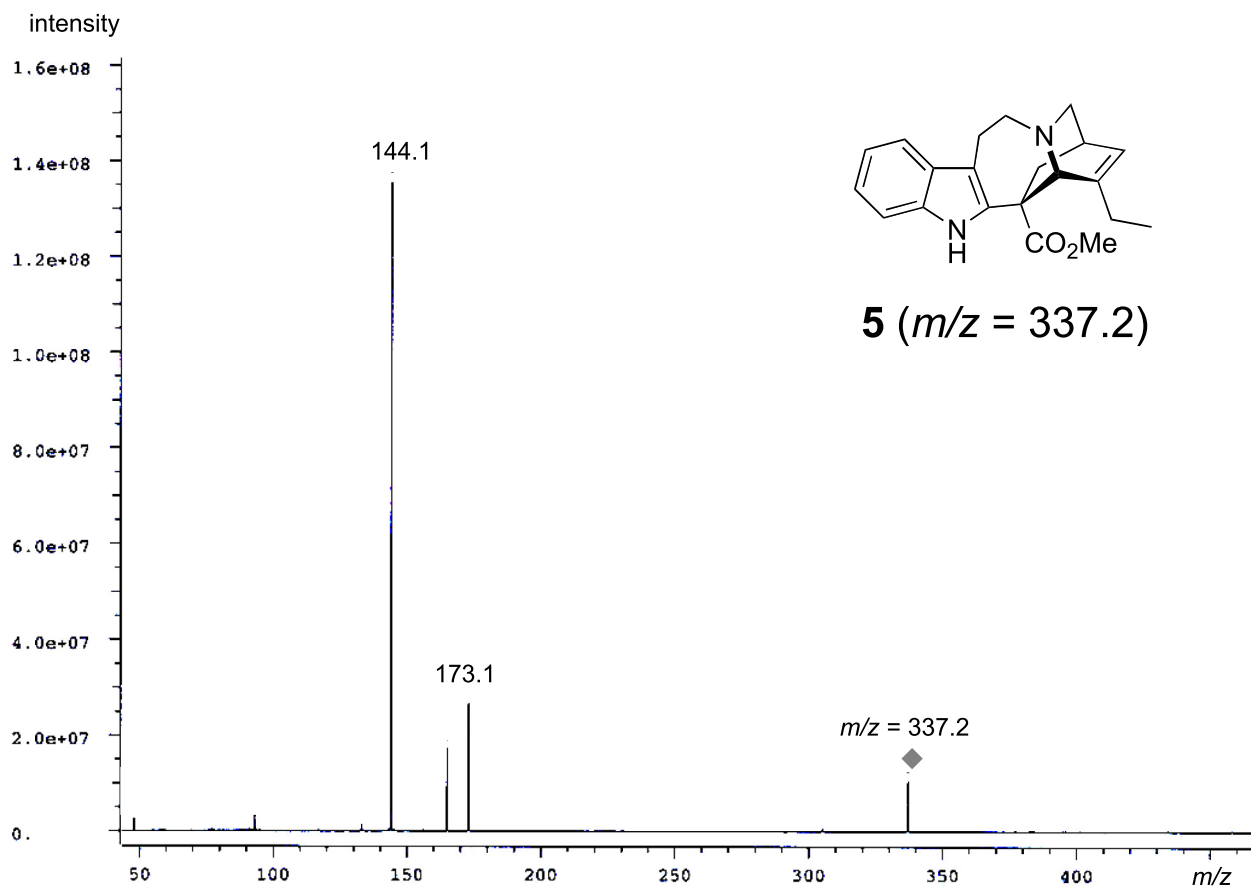

**Fig. S7.** MS/MS analysis for catharanthine **5** standard (A), fluorinated catharanthine **5a** (B), tabersonine **6** standard (C), and fluorinated tabersonine (D). (A) Catharanthine is identified as the  $m/z = 337.2$  ion showing the fragments  $m/z = 173.1$  and  $144.1$ . (B) Fluorinated catharanthine is identified as the  $m/z = 355.2$  ( $337.2 + 18$ ) ion showing the fragments  $m/z = 191.1$  ( $173.1 + 18$ ) and  $162.1$  ( $144.1 + 18$ ). (C) Tabersonine is identified as the  $m/z = 337.2$  ion showing the fragments  $m/z = 305.2$ ,  $277.2$ ,  $249.1$ ,  $228.1$ ,  $196.1$  and  $168.1$ . (D) Fluorinated tabersonine is identified as the  $m/z = 355.2$  ( $337.2 + 18$ ) ion showing the fragments  $m/z = 323.2$  ( $305.2 + 18$ ),  $295.2$  ( $277.2 + 18$ ),  $267.1$  ( $249.1 + 18$ ),  $246.1$  ( $228.1 + 18$ ),  $214.1$  ( $196.1 + 18$ ), and  $186.1$  ( $168.1 + 18$ ).

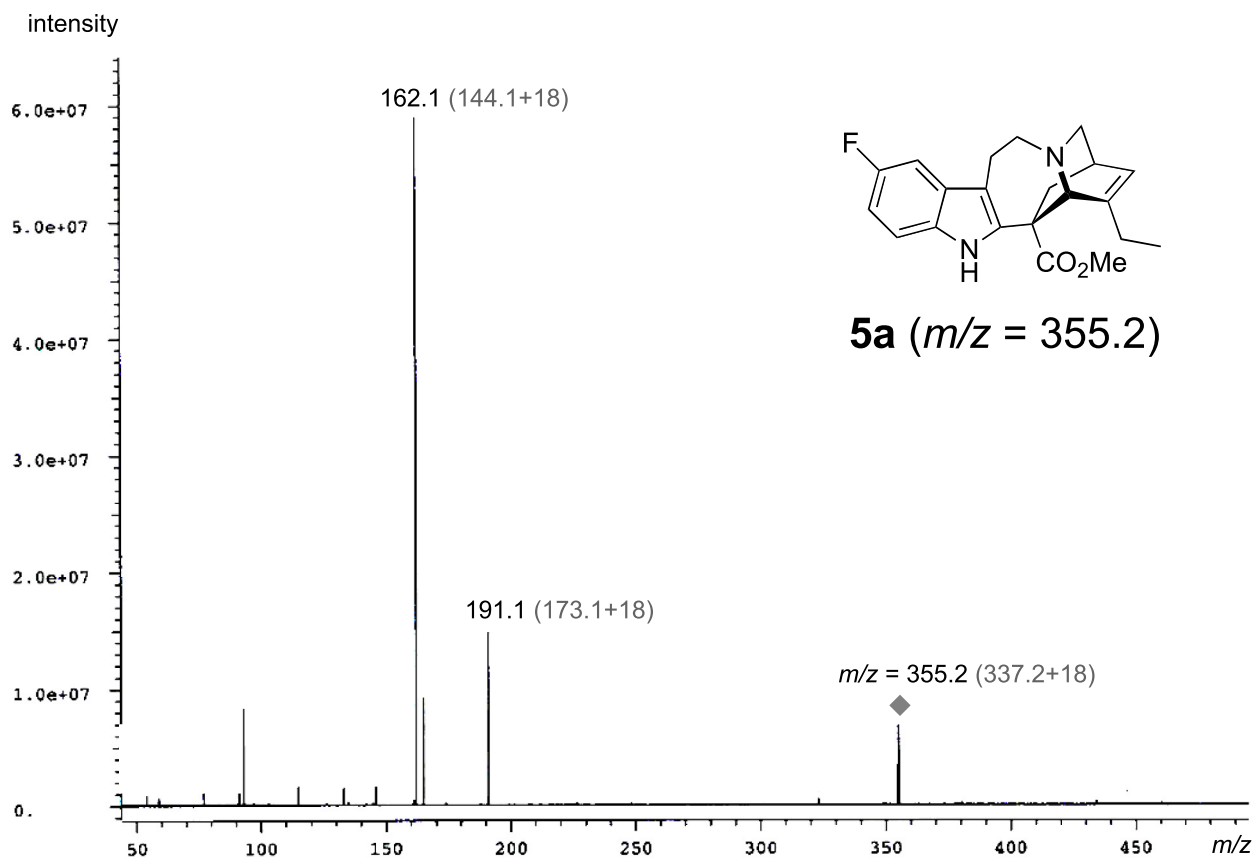

Fig. S7 (continued).

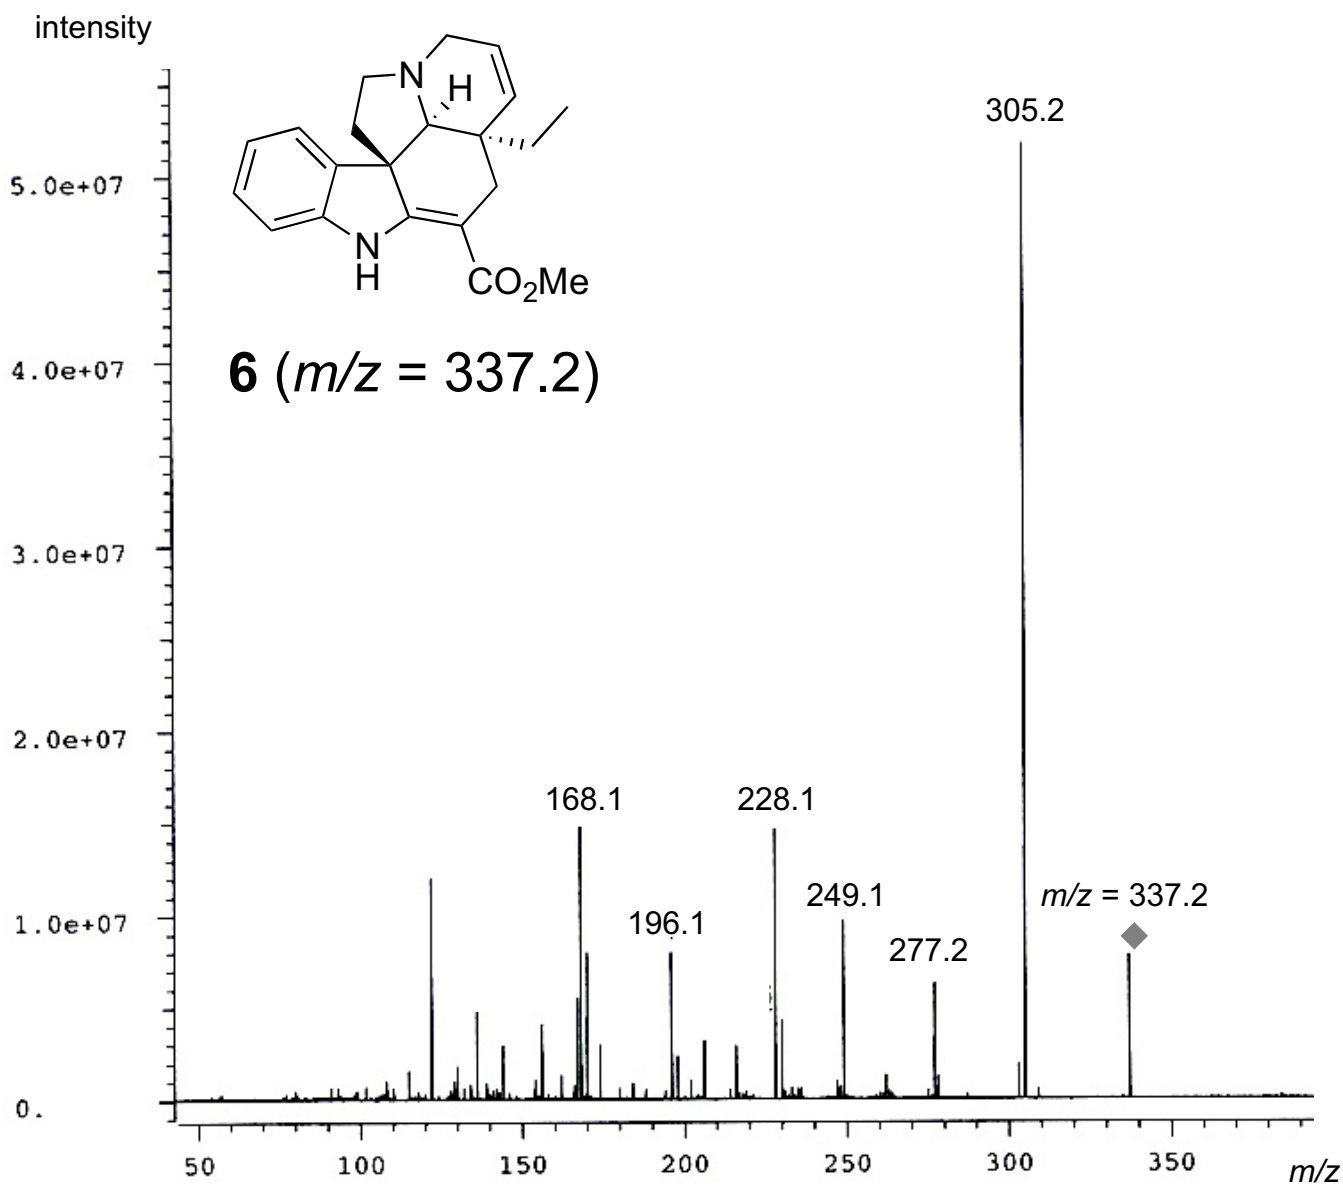

Fig. S7 (continued).



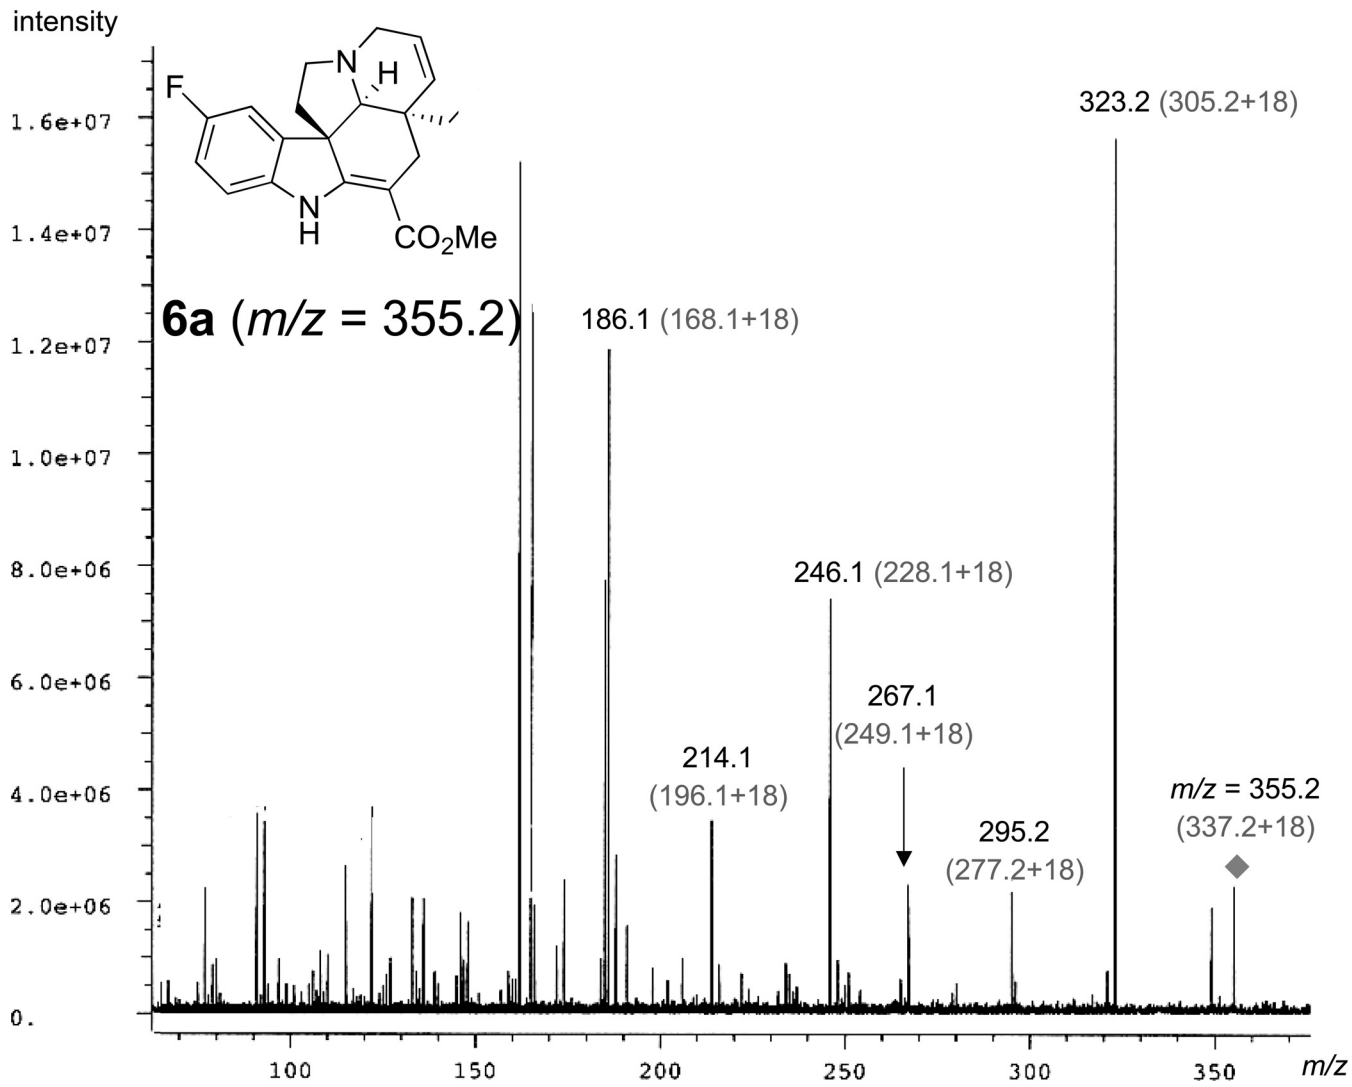

Fig. S7 (continued).

## Stability of Alkaloid Production Suppression in TDCi Hairy Roots

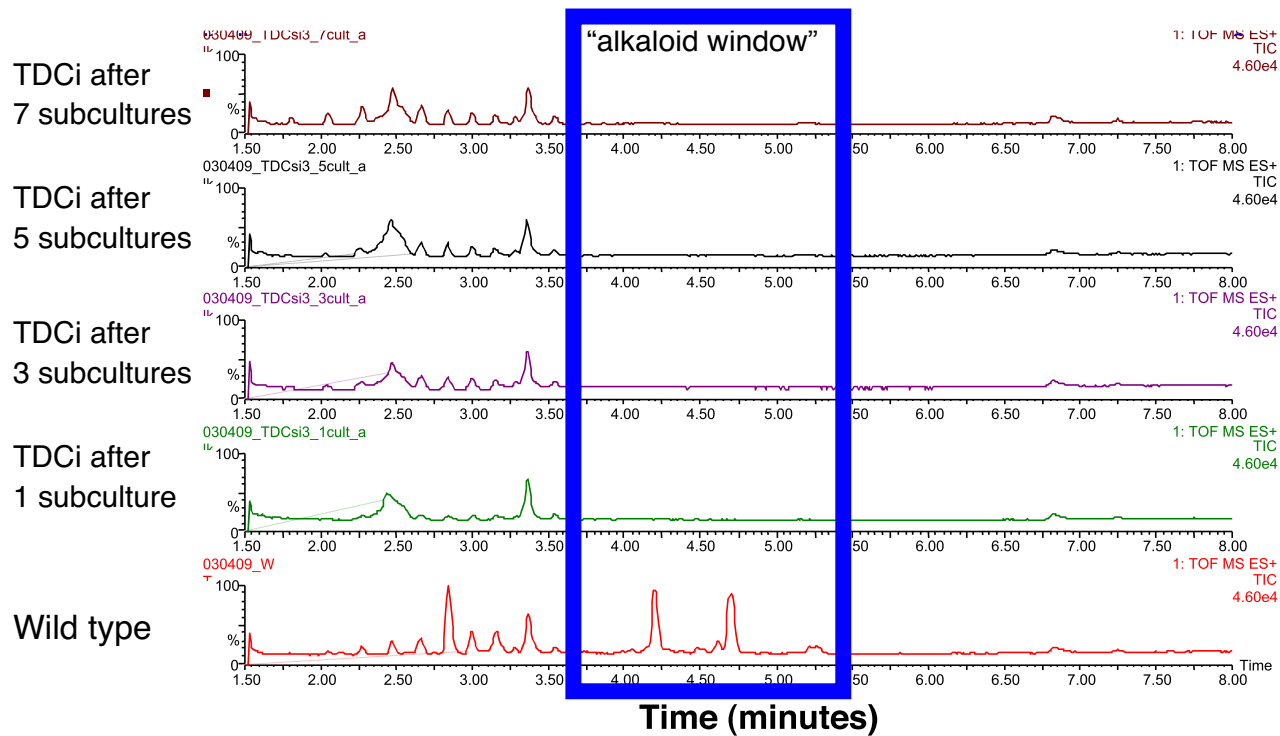

Fig. S8. Metabolite production in TDCi hairy roots after 1, 3, 5 and 7 subcultures as evidenced by LC-MS analysis of *C. roseus* extracts. "Alkaloid window" represents the range of retention time that natural *C. roseus* alkaloids usually elute.

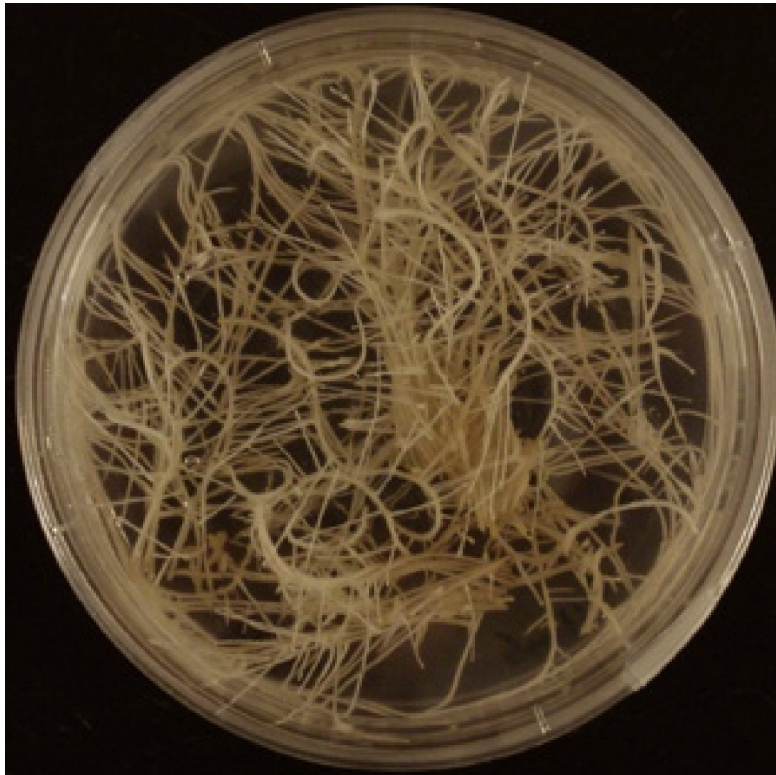

Fig. 59. (a) Two-week-old wild-type hairy roots in solid Gamborg's B5 media.

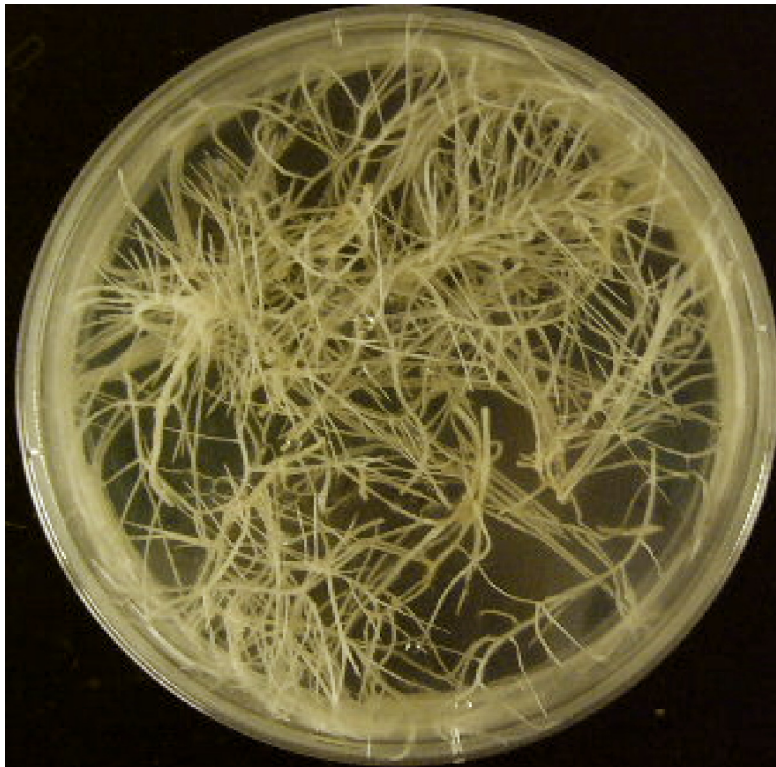

Fig. S9 (continued). (b) Two-week-old TDCi hairy roots in solid Gamborg's B5 media.

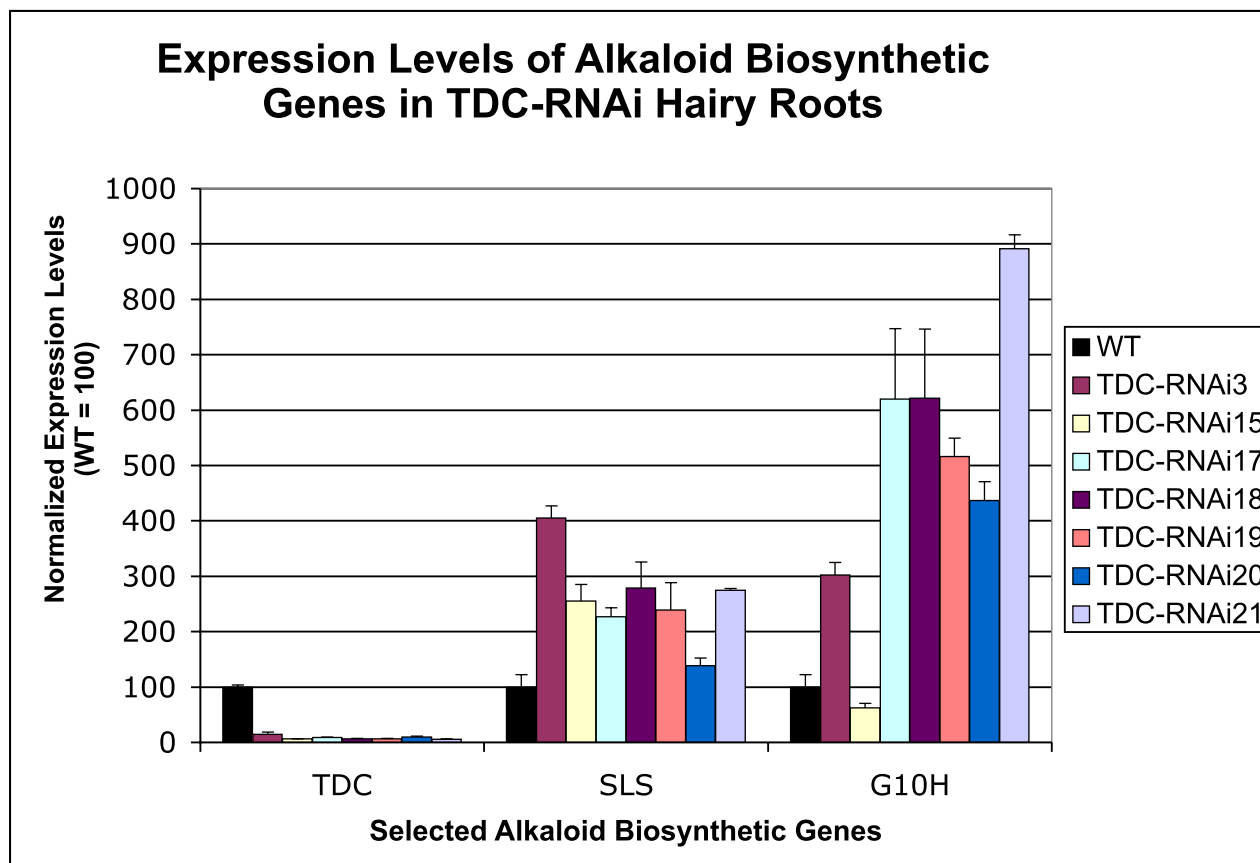

**Fig. S10.** Expression levels of SLS and G10H in 7 different TDCi lines measured by RT PCR. Expression levels of the silenced lines are normalized to the expression levels in the wild-type hairy root line. TDC (tryptophan decarboxylase) expression levels are shown for comparison. SLS (secologanin synthase), G10H (geraniol-10-hydroxylase).

## Other Supporting Information Files

[Table S1](#)
