# Supplementary material
Source: PubMed Central journal article supplement (PMC2728952)
Supplement: 0903393106_ST1_PDF.pdf [file 0903393106_ST1_PDF.pdf]

**Table S1.** High resolution MS data for alkaloids observed in hairy root extracts

|                                                                                     |                                                                                        | R = H                                | R = F                                |
|-------------------------------------------------------------------------------------|----------------------------------------------------------------------------------------|--------------------------------------|--------------------------------------|
| 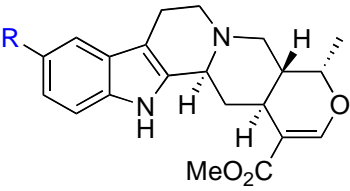   | <b>Ajmalicine</b><br>Expected [M+H]<br>Observed [M+H]<br>Accuracy (ppm)<br>RT (min)    | 353.1865<br>353.1856<br>-2.5<br>4.25 | 371.1765<br>371.1760<br>-3.0<br>4.66 |
|    | <b>Tabersonine</b><br>Expected [M+H]<br>Observed [M+H]<br>Accuracy (ppm)<br>RT (min)   | 337.1916<br>337.1922<br>1.8<br>4.65  | 355.1816<br>355.1811<br>-3.1<br>5.20 |
|    | <b>Serpentine</b><br>Expected [M+H]<br>Observed [M+H]<br>Accuracy (ppm)<br>RT (min)    | 349.1552<br>349.1548<br>-1.1<br>4.45 | 367.1452<br>367.1453<br>-1.4<br>4.72 |
|  | <b>Catharanthine</b><br>Expected [M+H]<br>Observed [M+H]<br>Accuracy (ppm)<br>RT (min) | 337.1916<br>337.1916<br>0.0<br>4.48  | 355.1816<br>355.1818<br>-1.1<br>4.88 |

RT, retention time; LC gradient 10-60% acetonitrile/water (0.1% TFA) in 13 minutes
